# Supplementary material
Source: MDPI journal article supplement (https://www.mdpi.com/2227-7099/12/5/108)
Supplement: s1 [file s1]

Article

# The Impact of the Stimulus Packages on the Economy during COVID-19 in Bangladesh: A Mixed-Method Approach

Ruhul Amin \*, Nahian Rahman, Samira Tasnim, Sima Rani Dey and Mohammad Tareque

## Supplementary Materials

### Survey Questionnaire

#### Package: Salary Support for Export Oriented RMG Industries

IS YOUR WORK EXPERIENCE EQUAL OR ABOVE THREE AND HALF YEARS?

- Yes
- No

#### Workers Demographic Profile

GENDER OF THE RESPONDENTS

- Male
- Female

STUDY ZONE

- Narayanganj
- Savar
- Gazipur

COMPANY NAME

EDUCATIONAL LEVEL

- Uneducated
- Primary
- S.S.C
- H.S.C
- Honors
- Masters'
- Others

CURRENT AGE OF THE RESPONDENT

- Less than 15 Years
- 15-25 Years
- More than 25 Years

MARITAL STATUS

- Married
- Unmarried
- Others

NUMBER OF CHILDREN

FAMILY SIZE OF THE RESPONDENT

NUMBER OF OTHER EARNING MEMBERS IN THE FAMILY

NUMBER OF DEPENDENTS

## MONTHLY SALARY

- 5-8K
- 8-12K
- More than 12K

## DID YOU RECEIVE ANY SALARY SUPPORT?

- Yes
- No

## MODE OF THE RECEIVAL OF SALARY SUPPORT

- Bank Account
- Mobile Financial Service
- Hand Cash

## IF YES, WHAT WAS THE % OF SALARY SUPPORT?

- Low (10-30%)
- Medium (30-60%)
- High (More than 60%)

## THE SALARY SUPPORT WAS SUFFICIENT

- Strongly Agree
- Agree
- Neutral
- Disagree
- Strongly Disagree

## WORKER'S JOB TYPES

- Production Section (Daily Wage Basis)
- Registered Employee
- Others

## THE SALARY SUPPORT WAS ESSENTIAL

- Strongly Agree
- Agree
- Neutral
- Disagree
- Strongly Disagree

## HOW DISTRESSING WAS IT FOR YOU TO SURVIVE WITHOUT THE SALARY SUPPORT?

- Strongly distressing
- distressing
- Indifferent
- Less distressing
- Severely distressing

**Economic Aspects**

## YOU WERE BETTER OFF WITHOUT THE SALARY SUPPORT?

- Strongly Agree
- Agree
- Neutral

- Disagree
- Strongly Disagree

YOUR EXPENDITURE ON FOOD ITEMS WAS LOWER THAN BEFORE COVID-19.

- Strongly Agree
- Agree
- Neutral
- Disagree
- Strongly Disagree

YOUR EXPENDITURE ON NON-FOOD ITEMS WAS LOWER THAN BEFORE COVID-19.

- Strongly Agree
- Agree
- Neutral
- Disagree
- Strongly Disagree

PLACE OF RESIDENCE DURING COVID-19

- Urban
- Rural

WHERE DID YOU STAY?

- Rent
- Own House

YOU WERE ABLE TO PAY RENT REGULARLY

- Strongly Agree
- Agree
- Neutral
- Disagree
- Strongly Disagree

DID YOU TEMPORARILY SWITCH YOUR JOB DURING THE COVID 19 PERIOD TO SURVIVED?

- Yes
- No

IF YES, TYPES OF THE SWITCH JOB

- Farming
- Day laborer
- Others

YOU WERE ABLE TO PAY WATER BILLS REGULARLY

- Strongly Agree
- Agree
- Neutral
- Disagree
- Strongly Disagree

YOU WERE ABLE TO PAY GAS BILLS REGULARLY

- Strongly Agree
- Agree

- Neutral
- Disagree
- Strongly Disagree

YOU WERE ABLE TO PAY WATER BILLS REGULARLY

- Strongly Agree
- Agree
- Natural
- Disagree
- Strongly Disagree

YOU WERE ABLE TO PAY INTERNET BILLS AND/OR RECHARGE YOUR MO-BILES REGULARLY

- Strongly Agree
- Agree
- Neutral
- Disagree
- Strongly Disagree

WERE YOU ABLE TO SEND YOUR CHILDREN TO SCHOOL/PAY FOR HIS EDUCATION DURING THE PANDEMIC?

- Yes
- No

DID YOU TAKE A LOAN?

- Yes
- No

IF YES, WHAT WAS THE AMOUNT? .....

DID YOU HAVE ANY SAVINGS DURING THOSE MONTHS?

- Yes
- No

IF YES, WHAT WAS THE AMOUNT? .....

### Health Aspects

WERE YOU INFECTED BY THE COVID-19 VIRUS?

- Yes
- No

YOU WERE ABLE TO PAY YOUR HEALTHCARE BILLS REGULARLY

- Strongly Agree
- Agree
- Neutral
- Disagree
- Strongly Disagree

YOU WERE ABLE TO BUY MASKS FOR THE PROTECTION FROM COVID-19 VIRUS

- Strongly Agree
- Agree
- Neutral
- Disagree

- Strongly Disagree

YOU WERE ABLE TO BUY SANITIZER FOR THE PROTECTION FROM COVID-19 VIRUS

- Strongly Agree
- Agree
- Neutral
- Disagree
- Strongly Disagree

YOU WERE ABLE TO BUY HAND WASH FOR THE PROTECTION FROM COVID-19 VIRUS

- Strongly Agree
- Agree
- Neutral
- Disagree
- Strongly Disagree

DID YOUR FACTORY PROVIDE YOU WITH ANY COVID-19 HYGIENE SAFETY KIT?

- Yes
- No

### **Psychological and Social Aspects**

THE SALARY Support was ABLE TO REDUCE THE FINANCIAL CRISIS IN YOUR FAMILY

- Strongly Agree
- Agree
- Neutral
- Disagree
- Strongly Disagree

YOU HAD MENTAL HEALTH ISSUES DURING COVID-19

- Strongly Agree
- Agree
- Neutral
- Disagree
- Strongly Disagree

YOUR MENTAL WELLBEING IMPROVED DUE TO SALARY SUPPORT

- Strongly Agree
- Agree
- Neutral
- Disagree
- Strongly Disagree

THE SALARY SUPPORT MADE YOU MOTIVATED TO WORK FOR THE INDUSTRY.

- Strongly Agree
- Agree
- Neutral

- Disagree
- Strongly Disagree

SALARY SUPPORT HAS HELP TO REDUCE FAMILY FEUD

- Strongly Agree
- Agree
- Neutral
- Disagree
- Strongly Disagree

RECEIVING SALARY SUPPORT IMPROVED YOUR SOCIAL STANDARD IN THE COMMUNITY.

- Strongly Agree
- Agree
- Neutral
- Disagree
- Strongly Disagree

DO YOU HAVE EXTENDED FAMILY?

- Yes
- No

DO YOU HAVE EXTENDED FAMILY?

- Yes
- No

WERE YOU ABLE TO SUPPORT YOUR EXTENDED FAMILY IN COVID-19?

- Yes
- No

#### Package: Working Capital Loan for Affected Industries & Service Sector

#### Industry/Service Sector Organization Profile

Entity Name:

Stimulus Support Receival Status: ☐ Yes ☐ No

If Yes, Stimulus Support Receival

Date: \_\_\_\_\_/\_\_\_\_\_/\_\_\_\_\_ (dd/mm/yyyy) Stimulus Support Amount: \_\_\_\_\_ BDT

Respondent Name:

Designation:

E-mail Id:

Phone No.:

#### Part A (Key Performance Indicator Details)

| Indicators             | FY 2017-18 | FY 2018-19 | FY 2019-20 | FY 2020-21 | FY 2021-22 |
|------------------------|------------|------------|------------|------------|------------|
| Total Assets           |            |            |            |            |            |
| Return on Assets (ROA) |            |            |            |            |            |

|                          |
|--------------------------|
| Return on Equity (ROE)   |
| Fixed Assets             |
| Net Profit Before Tax    |
| Net Profit After Tax     |
| Number of employees      |
| Debt to Equity Ratio     |
| Earnings per share (EPS) |
| Diluted EPS              |
| Investment               |
| Long Term Loan           |
| Short Term Loan          |
| Dividend                 |

### Part B (Challenges Faced During the COVID-19 Pandemic)

You can select multiple answers.

- What kind of difficulties did you face in the Production Process?
  - ☐ Shortage of Inventory
  - ☐ Exporting goods
  - ☐ Low demand
  - ☐ Outsourcing Production
  - ☐ Others: \_\_\_\_\_
- What type of difficulties did you face as regards the Employment Scenario?
  - ☐ Wages were difficult to give.
  - ☐ Workers were difficult to hire after lockdown.
  - ☐ Most workers left for their homes/village.
  - ☐ Temporary workers were retrenched mostly.
  - ☐ Permanent workers were retrenched mostly.
  - ☐ Others: \_\_\_\_\_
- What were the difficulties faced in meeting up the Expenditures?
  - ☐ Expenditure on fuel was more than in the pandemic period.
  - ☐ Raw materials costs were higher than in the pandemic period.
  - ☐ It was difficult to pay for outstanding loan payments.
  - ☐ It was difficult to pay for R&D activities.
  - ☐ Others: \_\_\_\_\_
- What type of difficulties did you face as regards the Disbursement Scenario?
  - ☐ We had order cancellations from local buyers.
  - ☐ We had order cancellations from foreign buyers.
  - ☐ Shipping was not available.
  - ☐ We had supply delays.
  - ☐ We had too much stock of our finished goods
  - ☐ Stock of raw materials was low.
  - ☐ Our distribution Channel(s) was/were disturbed.
  - ☐ Others: \_\_\_\_\_
- What were the Operational Challenges faced by your organization?
  - ☐ Shortage of cash flows
  - ☐ Shortage of inputs
  - ☐ Difficulties fulfilling contracts.
  - ☐ Shortage of workers

☐ Others: \_\_\_\_\_

6. **What were the Financial Challenges faced by your organization?**

☐ Fixed cost payments (Rent, insurance, etc.)

☐ Loan repayments.

☐ Payment of invoices/deliveries

☐ Others: \_\_\_\_\_

7. **What were the External Factors that impacted your Organisation?**

☐ Reduction of orders

☐ Downward pressure on prices

☐ Others: \_\_\_\_\_

**Part C- Purchasing Managers Index Data for Industries**

| Time period                      | New Orders | Production/Output Level (in Crore BDT) | Suppliers' Delivery Times (in days) | Sales (in Crore BDT) | Inventory Levels (in Crore BDT) | Number of employees | Electricity/Fuel Usage Kilowatt-hour (kWh) |
|----------------------------------|------------|----------------------------------------|-------------------------------------|----------------------|---------------------------------|---------------------|--------------------------------------------|
| <b>Pre-COVID Scenario</b>        |            |                                        |                                     |                      |                                 |                     |                                            |
| Feb 2019                         |            |                                        |                                     |                      |                                 |                     |                                            |
| Feb 2020                         |            |                                        |                                     |                      |                                 |                     |                                            |
| <b>COVID Scenario</b>            |            |                                        |                                     |                      |                                 |                     |                                            |
| May 2019                         |            |                                        |                                     |                      |                                 |                     |                                            |
| May 2020                         |            |                                        |                                     |                      |                                 |                     |                                            |
| <b>Business Revival Scenario</b> |            |                                        |                                     |                      |                                 |                     |                                            |
| Feb 2020                         |            |                                        |                                     |                      |                                 |                     |                                            |
| Feb 2021                         |            |                                        |                                     |                      |                                 |                     |                                            |

N.B.: a- Time lag between order placement and delivery by the supplier; b- Raw materials purchased and kept in a warehouse to be used for production.



## Part C-Purchasing Managers Index Data for Service Sector Organizations

| Time period                          | Inventory Levels<br>(in Crore BDT) | Current<br>Investments<br>(in Crore BDT) | Net Profit After<br>Tax<br>(in Crore BDT) | Number of<br>employees | Electricity Usage<br>Kilowatt-hour<br>(kWh) |
|--------------------------------------|------------------------------------|------------------------------------------|-------------------------------------------|------------------------|---------------------------------------------|
| <b>Pre-COVID Scenario</b>            |                                    |                                          |                                           |                        |                                             |
| Feb 2019                             |                                    |                                          |                                           |                        |                                             |
| Feb 2020                             |                                    |                                          |                                           |                        |                                             |
| <b>COVID Scenario</b>                |                                    |                                          |                                           |                        |                                             |
| May 2019                             |                                    |                                          |                                           |                        |                                             |
| May 2020                             |                                    |                                          |                                           |                        |                                             |
| <b>Business Revival<br/>Scenario</b> |                                    |                                          |                                           |                        |                                             |
| Feb 2020                             |                                    |                                          |                                           |                        |                                             |
| Feb 2021                             |                                    |                                          |                                           |                        |                                             |

## Package: Working Capital Loan for CMSMEs

## CMSMEs Profile

## NUMBER OF EMPLOYEES IN THE ENTERERPRISE

- Less than to
- Between 10-24
- Between 25-99
- Between 100 250

## CATEGORY OF RESPONDENTS

- Cottage Entrepreneurs
- Micro Entrepreneurs
- Small Entrepreneurs
- Medium Entrepreneurs

## GENDER

- Male
- Female

## EDUCATION LEVEL

- No Education
- Primary
- Secondary
- Higher Secondary
- Graduate

## DIVISION OF OPERATION

- Dhaka
- Chittagong
- Rajshahi
- Khulna

## RESIDENCE

- Rural
- Urban

## INDUSTRY

- Service
- Manufacture

(AGE IN YEARS) .....

YEARS OF EXPERIENCE .....

EXISTENCE OF TIN ACCOUNT .....

- Yes
- No

DO YOU REGULARLY SUBOT TAX RETURN

- Yes
- No

SOURCE OF RAW MATERIALS FOR THE PRODUCTION OF YOUR ENTERPRISE

- Local
- Foreign
- Both

WHICH IS YOUR TARGETED MARKET?

- Local
- Foreign
- Both

DID YOU RECEIVE FINANCIAL SUPPORT FROM ANY NGOS?

- Yes
- No

HOW DID YOU INVESTE THE CAPITAL OF STIMULUS PACKAGET

- On business recovery
- To start new business
- To repay loan
- To pay wage of workers

STIMULUS PACKAGES TARGETING SAJES PLEASE RATE YOUR LEVEL OF AGREEMENT REGARDING KNOWLEDGE ABOUT STIMULLYS BACKAGES WITH THE FOLLOWING STATEMENTS

- Strongly Agree
- Agree
- Neutral
- Disagree
- Strongly Disagree

I WAS INFORAIED ABOUT ALL KINDS OF STIMULUS PACKAGES ON OFFER

- Strongly Agree
- Agree
- Neutral
- Disagree
- Strongly Disagree

LEARNED ABOUT THE PACKAGES FROM SOCIAL MEDIA

- Strongly Agree
- Agree
- Neutral
- Disagree
- Strongly Disagree

LEARNED ABOUT THE PACKAGES FROM TV & RADIO

- Strongly Agree
- Agree
- Neutral
- Disagree
- Strongly Disagree

LEARNED ABOUT THE PACKAGES FROM NEWSPAPER

- Strongly Agree
- Agree
- Neutral
- Disagree
- Strongly Disagree

I KNOW OTHER SMES WHO RECEIVED PACKAGES

- Strongly Agree
- Agree
- Neutral
- Disagree
- Strongly Disagree

STIMULUS PACKAGES TARGETING SMES, PLEASE RATE YOUR LEVEL OF AGREEMENT REGARDING ACCESS TO STIMULUS PACKAGES WITH THE FOLLOWING STATEMENTS

- Strongly Agree
- Agree
- Neutral
- Disagree
- Strongly Disagree

I KNOW THE DOCUMENT PREPARATION PROCESS TO RECEIVE THE PACKAGES

- Strongly Agree
- Agree
- Neutral
- Disagree
- Strongly Disagree

PREPARING DOCUMENTS FOR RECEIVING THE STIMULUS WAS EASY

- Strongly Agree
- Agree
- Neutral
- Disagree
- Strongly Disagree

FINANCIAL LITERACY OF SME OWNERS IS ESSENTIAL TO GET ACCESS TO VARIOUS BANKING PRODUCTS

- Strongly Agree
- Agree
- Neutral
- Disagree
- Strongly Disagree

LEARNED ABOUT THE PACKAGES FROM OTHER SME OWNERS

- Strongly Agree
- Agree
- Neutral
- Disagree
- Strongly Disagree

I KNOW OTHER SME OWNERS WHO APPLIED FOR THE PACKAGE

- Strongly Agree
- Agree
- Neutral

- Disagree
- Strongly Disagree

WE HAD TO USE ALTERNATIVE MEANS OF RECEIVING PRIMITIVES FROM CUSTOMERS

- Strongly Agree
- Agree
- Neutral
- Disagree
- Strongly Disagree

THE STIMULUS PACKAGE HELPED IN PAVING FOR THESE UNFORESEEN COSTS

- Strongly Agree
- Agree
- Neutral
- Disagree
- Strongly Disagree

PLEASE RATE YOUR LEVEL OF AGREEMENT WITH THE CHALLENGES TO EMPLOYING YOUR WORKER

- Strongly Agree
- Agree
- Neutral
- Disagree
- Strongly Disagree

IT WAS DIFFICULT TO PAY EMPLOYEES DURING THE LOCKDOWN

- Strongly Agree
- Agree
- Neutral
- Disagree
- Strongly Disagree

WE NEEDED TO PURCHASE HYGIENE AND SAFETY PRODUCTS FOR OUR WORKERS

- Strongly Agree
- Agree
- Neutral
- Disagree
- Strongly Disagree

THE STIMULUS AMOUNT WAS USED TO PAY EMPLOYEES WAGES

- Strongly Agree
- Agree
- Neutral
- Disagree
- Strongly Disagree

THE STIMULUS AMOUNT WAS USED TO PAY EMPLOYEES SAFETY MEASURES

- Strongly Agree
- Agree
- Neutral
- Disagree
- Strongly Disagree

DO YOU AGREE THAT GOVT. ANNOUNCED STIMULUS PACKAGE SUPPORT YOUR BUSINESS TO RECOVER FROM THE PANDEMIC?

- Strongly Agree
- Agree
- Neutral
- Disagree
- Strongly Disagree

WOULD YOU LIKE TO PROVIDE ANY SUGGESTIONS FOR IMPROVING THE DESIGN AND DELIVERY OF FUTURE STIMULUS?.....

**Package: Revitalizing the rural economy and job creation.**

Personal & Family information's

NAME.....

AGE (IN YEAR) .....

GENDER OF THE RESPONDENT

- Male
- Female

EDUCATIONAL QUALIFICATIONS

- Primary
- Secondary
- Higher Secondary
- Hons. & Above
- No Institutional Education
- Others (Specify):

OTHERS (SPECIFY):

NUMBER OF FAMILY MEMBERS (LIVING WITH) .....

NUMBER OF DEPENDENT CHILDREN .....

NUMBER OF DEPENDENT ELDERLY.....

NUMBER OF DEPENDENT SIBLING.....

DO YOU HAVE ANY SCHOOL GOING CHILDREN?.....

- Yes
- No
- Not Applicable

NO. OF SUCH CHILDREN.....

WHICH ORGANIZATION ARE YOU AFFILIATED?

- Joyeeta Foundation
- NGO Foundation
- BRBD
- SFDF
- PDBF
- SDF

WERE YOU A BENEFICIARY OF THE ORGANIZATION BEFORE THE PAN-DEMIC (TILL DECEMBER 2021)?

- Yes
- No

**Stimulus Information**

HAVE YOU RECEIVED THE COVID-19 STIMULUS LOAN?

- Yes
- No

WAS THE AMOUNT ADEQUATE?

- Yes

- No  
WHAT WAS THE LOAN AMOUNT?  
.....  
WHAT WAS THE INTEREST RATE?  
.....  
WHERE HAVE YOU USED THE DISBURSAL?
- Business Operation
- Family Expenses
- Redemption of old debts
- Asset creation (Enterprise activities)
- Other Activities

### Financial Information

MONTHLY INCOME/TURNOVER/PROFIT  
.....  
MONTHLY SAVINGS  
.....  
TOTAL CONSUMPTION EXPENDITURE  
.....  
DURABLE CONSUMPTION EXPENDITURE (YEARLY)  
.....  
TOTAL FOOD CONSUMPTION EXPENDITURE  
.....  
TOTAL NON-FOOD CONSUMPTION EXPENDITURE  
.....  
HOUSEHOLD ASSET(BDT)  
.....  
OUTSTANDING LOANS(BDT)  
.....  
MEDICAL EXPENDITURE (12 MONTH AVG.)  
.....

### Business Information

- AREA OF WORK?
- Agriculture
  - Manufacturing
  - Service
- HAVE YOU RECEIVED ANY ENTREPRENEURSHIP TRAINING?
- Yes
  - No

### Assessment of Poverty using multiple dimensions

- STRUCTURE USED FOR HOUSEHOLD:
- Jhupri
  - Kacha
  - Semi-paka
  - Paka
- DOES YOUR HOUSE HAVE ELECTRICITY ACCESS?
- Yes
  - No
- DOES YOUR HOUSEHOLD HAVE?

- Radio
- Refrigerator
- Television
- Non-mobile Telephone
- Mobile Telephone
- Bicycle
- Motorbike/ Scooter
- Car
- Truck
- Computer
- Animal-drawn Cart

### Impact Assessment Criteria (Economic Aspects)

WHAT TYPE OF WORK DO YOU DO?

- Agriculture/Consumer Goods production
- Processing/Packaging
- Daily Use Products production
- Retail
- Transportation
- Other (specify)

OTHERS(SPECIFY):

.....

HAS YOUR SOURCE OF INCOME CHANGED DURING THE PANDEMIC (TILL DECEMBER 2021)?

- Yes
- No

I COULD REGULARLY PAY LAND TAX

- Yes
- No

I COULD REGULARLY PAY MUNICIPALITY TAX

- Yes
- No

DO YOU PAY OTHER KIND OF TAXES?

- Yes
- No

YES(SPECIFY):

.....

COULD YOU REGULARLY PAY THOSE TAXES?

- Yes
- No

COULD REGULARLY PAY FOR FUEL (COOKING AND WORK) \*

- Yes
- No

I COULD REGULARLY PAY MOBILE BILLS \*

- Yes
- No

MY SAVINGS PATTERN WAS IMPACTED

- Very Badly
- Badly
- Stayed the Same

- In a good way
- In a very good way

DID YOU HAVE ANY FINANCIAL PLANS PRE-COVID? \*

- Yes
- No

HOW HAS COVID-19 AFFECTED THEM IN THE MEDIUM TERM (2-5 YEARS) \*

- Very Badly
- Badly
- Stayed the Same
- In a good way
- In a very good way

HOW HAS COVID-19 AFFECTED THEM IN THE LONG TERM (MORE THAN 5 YEARS)

- Very Badly
- Badly
- Stayed the Same
- In a good way
- In a very good way

IF FINANCIAL PLANS WERE IMPACTED, HOW LONG DID IT TAKE FOR YOU TO RETURN TO THE PRE-COVID STATE?

- 1 to less than 3 months
- 3 to less than 6 months
- 6 to 12 Months
- More than 12 Months

THE MICROLOAN PROVIDED ME WITH THE FUNDS TO KEEP MY BUSINESS/FARM OPERATING \*

- Yes
- No

NUMBER OF SOURCES OF HOUSEHOLD INCOME

- Decreased Greatly
- Decreased Somewhat
- Stayed the same
- Increased Somewhat
- Increased Greatly

#### **Impact Assessment Criteria (Loan aspects)**

THE INTEREST RATE ON THE COVID-19 LOAN WAS BENEFICIAL TO US IN A

- In a very good way
- Good way
- Moderate way

THE INSTALLMENT AMOUNT AND PERIOD SHOULD BE MORE FLEXIBLE

- Strongly Agree
- Agree
- Neutral
- Disagree
- Strongly Disagree

#### **Impact Assessment Criteria (Access to Finance)**

DO YOU HAVE A BANK ACCOUNT? \*

- Yes



- No
- DO YOU USE MOBILE BANKING?
- Yes
  - No
- DID YOU TAKE ANY LOANS FROM OTHER SOURCES EXCEPT FOR THE COVID-19 LOAN?
- Yes
  - No
- WHAT WAS THE AMOUNT?  
.....
- WHAT WAS THE SOURCE?
- Bank
  - Relatives
  - Friends
  - Others

#### **Impact Assessment Criteria (Business Aspects)**

- I COULD CONTINUE WORKING AND EARNING DURING THE LOCKDOWN
- Yes
  - No
- I FOUND A NEW SOURCE OF INCOME DURING THE LOCKDOWN
- Yes
  - No
- THE SIZE OF MY BUSINESS/FARM/LIVESTOCK
- Decreased Greatly
  - Somewhat Decreased
  - Stayed the same
  - Increased Somewhat
  - Increased Greatly
- THE AMOUNT OF TIME I WORKED DURING THE PANDEMIC (TILL DECEMBER 2021)
- Decreased Greatly
  - Somewhat Decreased
  - Stayed the same
  - Increased Somewhat
  - Increased Greatly
- WE HAD ACCESS TO RAW MATERIALS THROUGHOUT THE PANDEMIC (TILL DECEMBER 2021) \*
- Yes
  - No
- WE COULD PROVIDE OUR SERVICES/PRODUCTS TO OUR CUSTOMERS
- Yes
  - No
- THERE WERE DELAYS IN OUR DISTRIBUTION/ SERVICE DELIVERY
- Yes
  - No

#### **Impact Assessment Criteria (Employment)**

DO YOU EMPLOY ANYONE?

- Yes
- No

NUMBER OF FAMILY WORKERS

.....

NUMBER OF HIRED WORKERS

.....

RATIO OF FAMILY TO HIRED WORKERS

.....

THE NUMBER OF PEOPLE THAT WORKED FOR ME DURING THE PANDEMIC  
(TILL DECEMBER 2021)

- Increased
- Stayed the same
- Decreased

I PROVIDED MY WORKERS WITH MASKS AND OTHER SANITARY EQUIP-  
MENT

- All of them
- Some of them
- None of them

I PROVIDED MY WORKERS WITH MASKS AND OTHER SANITARY EQUIP-  
MENT

- All of them
- Some of them
- None of them

I PAID MY WORKERS DURING THE PANDEMIC (TILL DECEMBER 2021)

- Always
- Sometimes
- Never

### Impact Assessment Criteria (Food)

HOW DID YOUR CONSUMPTION OF RICE CHANGE DURING THE PANDEMIC  
(TILL DECEMBER 2021)?

- Greatly Decreased
- Somewhat Decreased
- Stayed the same
- Increased Somewhat
- Increased Greatly

HOW DID YOUR CONSUMPTION OF VEGETABLES CHANGE DURING THE  
PANDEMIC (TILL DECEMBER 2021)?

- Decreased Greatly
- Decreased Somewhat
- Stayed the same
- Increased Somewhat
- Increased Greatly

HOW DID YOUR CONSUMPTION OF DAAL CHANGE DURING THE PAN-  
DEMIC (TILL DECEMBER 2021)?

- Greatly Decreased
- Somewhat Decreased
- Stayed the same
- Increased
- Somewhat Increased Greatly

HOW DID YOUR CONSUMPTION OF EGGS CHANGE DURING THE PANDEMIC (TILL DECEMBER 2021)?

- Greatly Decreased
- Somewhat Decreased
- Stayed the same
- Increased Somewhat
- Increased Greatly

HOW DID YOUR CONSUMPTION OF MEAT (FISH, CHICKEN, BEEF) CHANGE DURING THE PANDEMIC (TILL DECEMBER 2021)?

- Greatly Decreased
- Somewhat Decreased
- Stayed the same
- Increased
- Somewhat Increased Greatly

**Impact Assessment Criteria (Health Aspects)**

WERE YOU ABLE TO PAY FOR MEDICINE DURING THE PANDEMIC (TILL DECEMBER 2021)?

- Yes
- No

DID YOU BUY SANITIZERS FOR THE PANDEMIC (TILL DECEMBER 2021)?

- Yes
- No

DID YOU BUY FACE MASKS DURING THE PANDEMIC (TILL DECEMBER 2021)?

- Yes
- No

DID YOU GO TO THE HOSPITAL/CLINIC DURING THE PANDEMIC (TILL DECEMBER 2021) TO CHECK FOR ILLNESS?

- Yes
- No

**Impact Assessment Criteria (Health Aspects)**

WERE YOU ABLE TO PAY FOR MEDICINE DURING THE PANDEMIC (TILL DECEMBER 2021)?

- Yes
- No

WERE YOU ABLE TO PAY FOR MEDICINE DURING THE PANDEMIC (TILL DECEMBER 2021)?

- Yes
- No

DID YOU BUY SANITIZERS FOR THE PANDEMIC (TILL DECEMBER 2021)?

- Yes
- No

DID YOU BUY FACE MASKS DURING THE PANDEMIC (TILL DECEMBER 2021)?

- Yes
- No

DID YOU GO TO THE HOSPITAL/CLINIC DURING THE PANDEMIC (TILL DECEMBER 2021) TO CHECK FOR ILLNESS?

- Yes

- No

**Impact Assessment Criteria (Psychological Aspects)**

I WAS AFRAID FOR MY FAMILY'S WELL-BEING DURING THE PANDEMIC (TILL DECEMBER 2021)

- Never
- Hardly Ever
- Neutral Frequently
- All the time

I WOULD THINK AND WORRY ABOUT MANY THINGS TOGETHER

- Never
- Hardly Ever
- Neutral frequently
- All the time

I HAD PROBLEMS RELAXING DURING THE PANDEMIC (TILL DECEMBER 2021)

- Never Hardly
- Ever Neutral
- Frequently
- All the time

I WAS RESTLESS DURING THE PANDEMIC (TILL DECEMBER 2021)

- Never
- Hardly Ever
- Neutral frequently
- All the time

I WAS EASILY ANNOYED AND IRRITABLE

- Hardly Never
- Ever Neutral
- Frequently
- All the time

I WAS WORRIED SOMETHING AWFUL WOULD HAPPEN

- Hardly Never
- Ever Neutral
- Frequently
- All the time

**Impact Assessment Criteria (Socio-Economic Aspects)**

WAS ABLE TO HELP MY FRIENDS FINANCIALLY

- Hardly Never
- Ever Neutral
- frequently
- All the time

I WAS ABLE TO HELP MY COMMUNITY THROUGH CHARITY

- Hardly Never
- Ever Neutral
- Frequently
- All the time

I WAS ABLE TO PROVIDE FINANCIAL HELP TO MY RELATIVES

- Hardly Never
- Ever Neutral
- frequently

- All the time

I WAS ABLE TO SHELTER PEOPLE IN MY HOUSE

- Hardly Never
- Ever Neutral
- Frequently
- All the time

I WAS ABLE TO FEED (CHARITY, GUESTS) PEOPLE BEYOND MY IMMEDIATE FAMILY

- Never
- Hardly Ever
- Neutral Frequently
- All the time

I CONTRIBUTED MORE TO MY FAMILY'S INCOME

- Never
- Hardly Ever
- Neutral frequently
- All the time

I WAS MORE ACTIVE IN HOUSEHOLD DECISION MAKING

- Never
- Hardly Ever
- Neutral frequently
- All the time
