# Supplementary material
Source: MDPI journal article supplement (https://www.mdpi.com/2227-7099/12/5/108)
Supplement: s1 [file s1]

## Article

# The Impact of the Stimulus Packages on the Economy during COVID-19 in Bangladesh: A Mixed-Method Approach

Ruhul Amin \*, Nahian Rahman, Samira Tasnim, Sima Rani Dey and Mohammad Tareque

## Supplementary Materials

### GRAMMS checklist

#### Good Reporting of a Mixed Methods Study (GRAMMS)

| Guideline                                                                                   | Section: page                                                           |
|---------------------------------------------------------------------------------------------|-------------------------------------------------------------------------|
| Describe the justification for using a mixed methods approach to the research question      | Methodology: Page 5                                                     |
| Describe the design in terms of the purpose, priority and sequence of methods               | Methodology: Pages 5 to 7                                               |
| Describe each method in terms of sampling, data collection and analysis                     | Data collection and analysis: Pages 5 to 7, Supplementary files 1 and 2 |
| Describe where integration has occurred, how it has occurred and who has participated in it | Discussion section: Pages 21-22<br>Conclusion: Pages 22 and 23          |
| Describe any limitation of one method associated with the present of the other method       | Conclusion: Pages 22 to 23                                              |
| Describe any insights gained from mixing or integrating methods                             | Discussion and conclusion: Pages 21-23                                  |
