# Supplementary material
Source: MDPI journal article supplement (https://www.mdpi.com/2227-7099/12/5/108)
Supplement: s1 [file s1]

Archive with 6 entries (6 files):
- economies-2921534 - Supplementary File S4-done.pdf
- economies-2921534 - Supplementary File S6-done.pdf
- economies-2921534- Supplementary File S1-done.pdf
- economies-2921534- Supplementary File S2-done.pdf
- economies-2921534- Supplementary File S5-done.pdf
- economies-2921534-Supplementary File S3-done.pdf
