# Supplementary material
Source: MDPI journal article supplement (https://www.mdpi.com/2227-7099/12/5/108)
Supplement: s1 [file s1 › economies-2921534-Supplementary File S3-done.pdf]

## Article

# The Impact of the Stimulus Packages on the Economy during COVID-19 in Bangladesh: A Mixed-Method Approach

Ruhul Amin \*, Nahian Rahman, Samira Tasnim, Sima Rani Dey and Mohammad Tareque

## Supplementary Materials

### Detailed methodology for all Package

#### Package: Salary Support for Export-Oriented RMG Industries

##### Quantitative Analysis

A Sample survey was conducted from the third week of February 2022 to the second week of March 2023.

|                                        |                                                                                                                                                                                                                                                                                                                                                                                                                                                                                                                  |
|----------------------------------------|------------------------------------------------------------------------------------------------------------------------------------------------------------------------------------------------------------------------------------------------------------------------------------------------------------------------------------------------------------------------------------------------------------------------------------------------------------------------------------------------------------------|
| Target Population                      | <ul style="list-style-type: none"> <li>Workers of BGMEA-certified garments industries that export 80% of their manufactured goods and must have paid off salaries for the months of December 2019 to February 2020.</li> <li>The target population was divided into two groups: (i) the treatment group, that received salary support under the stimulus package, and (ii) the control group that did not receive support from the stimulus package.</li> </ul>                                                  |
| Area                                   | <ul style="list-style-type: none"> <li>Areas/clusters were drawn from 3 districts (Dhaka, Narayanganj, and Gazipur) purposively where RMG workers and staff mostly live.</li> </ul>                                                                                                                                                                                                                                                                                                                              |
| Sample size/selection of beneficiaries | <ul style="list-style-type: none"> <li>A cluster sampling is used to randomly selected 1518 RMG workers, 1479 gave their consent for interviewing (97.34%). Workers were selected randomly from each cluster. <ul style="list-style-type: none"> <li>Treatment group: 985 (66.60%) and control group: 494 (33.40%)</li> <li>Detailed sample size selection described in Annex- B</li> </ul> </li> </ul>                                                                                                          |
| Data collection                        | <ul style="list-style-type: none"> <li>A structured survey questionnaire was developed focused on RMG workers' welfare aspects, including economic, health, psychological, and social domains.</li> <li>Aiming to enhance data accuracy and quality, data collection was done using tablets with Kobo Toolbox software. <ul style="list-style-type: none"> <li>A pilot study was conducted for pre-testing the questionnaire.</li> <li>Extensive training was provided to the enumerators</li> </ul> </li> </ul> |
| <b>Qualitative Analysis</b>            |                                                                                                                                                                                                                                                                                                                                                                                                                                                                                                                  |
| Method                                 | <ul style="list-style-type: none"> <li>Key-informant interviews (KIs) were conducted with relevant stakeholders and field experts (a total of 13 people)</li> </ul>                                                                                                                                                                                                                                                                                                                                              |

#### Package: Working Capital Loans to Affected Industries and Service Sector

##### Quantitative Analysis

A Sample survey was conducted from the second week of July 2023 to the second week of August 2023. It was email based survey.

|                                        |                                                                                                                                                                                                                                                                                                                                                                                                                                                                                                                                                                                                                                                                                                                                                             |
|----------------------------------------|-------------------------------------------------------------------------------------------------------------------------------------------------------------------------------------------------------------------------------------------------------------------------------------------------------------------------------------------------------------------------------------------------------------------------------------------------------------------------------------------------------------------------------------------------------------------------------------------------------------------------------------------------------------------------------------------------------------------------------------------------------------|
| Method                                 | <ul style="list-style-type: none"> <li>Field survey of large industries and service sector enterprises.</li> </ul>                                                                                                                                                                                                                                                                                                                                                                                                                                                                                                                                                                                                                                          |
| Target Population                      | <ul style="list-style-type: none"> <li>COVID-19 affected large export-oriented industries and service sector enterprises (RMG, pharma, hospitals, and plastic industries) that received working capital loans during the pandemic from May 2020 to July 2022.</li> <li>The target population was divided into two groups: (i) the treatment group that received working capital loans and (ii) the control group that did not receive the loan.</li> </ul>                                                                                                                                                                                                                                                                                                  |
| Area                                   | <ul style="list-style-type: none"> <li>All over the country.</li> </ul>                                                                                                                                                                                                                                                                                                                                                                                                                                                                                                                                                                                                                                                                                     |
| Sample size/selection of beneficiaries | <ul style="list-style-type: none"> <li>A simple random sampling technique was used to select a total of 128 industries and service enterprises registered with the Financial Reporting Council (FRC). <ul style="list-style-type: none"> <li>Treatment group: 64 and control group: 64</li> </ul> </li> <li>Among the selected 128 industries, only 30 (21 treatments and 9 control) industries and service enterprises provided financial information for pre-COVID-19, COVID-19, and post-COVID-19. <ul style="list-style-type: none"> <li>List of Firms described in Table A18 of annex A.</li> <li>Response rate, treatment group- 32.81% and control group 14.06%.</li> <li>Detailed sample size selection described in Annex-B</li> </ul> </li> </ul> |
| Data collection                        | <ul style="list-style-type: none"> <li>A structured survey questionnaire was formulated to collect information on the financial performance of the industries and service enterprises from FY 2017-18 to FY 2021-22.</li> </ul>                                                                                                                                                                                                                                                                                                                                                                                                                                                                                                                             |
| <b>Qualitative Analysis</b>            |                                                                                                                                                                                                                                                                                                                                                                                                                                                                                                                                                                                                                                                                                                                                                             |
| Method                                 | <ul style="list-style-type: none"> <li>Key-informant interviews (KIs) were conducted with relevant stakeholders and field experts (a total of 13 people)</li> </ul>                                                                                                                                                                                                                                                                                                                                                                                                                                                                                                                                                                                         |

#### Package: Working Capital Loans for the Cottage, Micro, Small and Medium Enterprises

##### Quantitative Analysis

A Sample survey was conducted from the 28<sup>th</sup> of February to the 15<sup>th</sup> of March, 2023.

|                   |                                                                                                                                                                                                       |
|-------------------|-------------------------------------------------------------------------------------------------------------------------------------------------------------------------------------------------------|
| Method            | <ul style="list-style-type: none"> <li>Field survey</li> </ul>                                                                                                                                        |
| Target Population | <ul style="list-style-type: none"> <li>Business owner of Cottage, Micro, Small and Medium Enterprises</li> <li>A focus on identifying business owners who had received the stimulus funds.</li> </ul> |

| Package: Working Capital Loans for the Cottage, Micro, Small and Medium Enterprises |                                                                                                                                                                                                                                                                                                                                                                                                                                                                                                                                                                                                                                                                                                 |
|-------------------------------------------------------------------------------------|-------------------------------------------------------------------------------------------------------------------------------------------------------------------------------------------------------------------------------------------------------------------------------------------------------------------------------------------------------------------------------------------------------------------------------------------------------------------------------------------------------------------------------------------------------------------------------------------------------------------------------------------------------------------------------------------------|
| Quantitative Analysis                                                               |                                                                                                                                                                                                                                                                                                                                                                                                                                                                                                                                                                                                                                                                                                 |
| Area                                                                                | <ul style="list-style-type: none"> <li>Six districts across four divisions:               <ol style="list-style-type: none"> <li>Dhaka Division: Dhaka &amp; Tangail</li> <li>Chattogram Division: Chattogram &amp; Cumilla</li> <li>Khulna Division: Jashore</li> <li>Rajshahi Division: Bogura</li> </ol> </li> <li>Geographic distribution of responses is presented in Figure A7 of annex A, which offers an overview of the dataset's representation across different regions.</li> </ul>                                                                                                                                                                                                  |
| Sample size/selection of beneficiaries                                              | <ul style="list-style-type: none"> <li>A total sample size of 645 CMSMEs was selected using multi-stage cluster sampling,</li> <li>Out of the 645 CMSMEs contacted for participation in the survey, 585 CMSMEs responded, resulting in a response rate of 90.7 percent.               <ul style="list-style-type: none"> <li>A refusal rate of 9.3% for the data collection phase.</li> <li>Detailed sample size selection described in Annex-B</li> </ul> </li> </ul>                                                                                                                                                                                                                          |
| Data collection                                                                     | <ul style="list-style-type: none"> <li>A structured survey questionnaire was developed</li> <li>To enhance data accuracy and quality, data collection was done using tablets with Kobo Toolbox software.</li> <li>The enumerators were trained extensively with both the survey questionnaire and the tablet-base application</li> </ul>                                                                                                                                                                                                                                                                                                                                                        |
| Qualitative Analysis                                                                |                                                                                                                                                                                                                                                                                                                                                                                                                                                                                                                                                                                                                                                                                                 |
| Method                                                                              | <ul style="list-style-type: none"> <li>Key-informant interviews (KIIs) were conducted with relevant stakeholders and field experts (a total of 8 people)</li> </ul>                                                                                                                                                                                                                                                                                                                                                                                                                                                                                                                             |
| Package: Revitalizing the rural economy and job creation                            |                                                                                                                                                                                                                                                                                                                                                                                                                                                                                                                                                                                                                                                                                                 |
| Quantitative Analysis                                                               |                                                                                                                                                                                                                                                                                                                                                                                                                                                                                                                                                                                                                                                                                                 |
| A Sample survey was conducted between the 24th and 27th July.                       |                                                                                                                                                                                                                                                                                                                                                                                                                                                                                                                                                                                                                                                                                                 |
| Target Population                                                                   | <ul style="list-style-type: none"> <li>Micro finance/credit to the marginal people and woman entrepreneurs' beneficiaries from five Institutions.</li> <li>The target population was divided into two groups: (i) the treatment group, that received salary support under the stimulus package, and (ii) the control group that did not receive support from the stimulus package.</li> </ul>                                                                                                                                                                                                                                                                                                   |
| Area                                                                                | <ul style="list-style-type: none"> <li>Areas/clusters were drawn from 4 districts (Dhaka city, Cumilla, Jashore, and Mymensingh) .</li> </ul>                                                                                                                                                                                                                                                                                                                                                                                                                                                                                                                                                   |
| Sample size/selection of beneficiaries                                              | <ul style="list-style-type: none"> <li>A stratified random sampling approach was used to select the respondents and stratification based on the institution under which the respondents got the micro-credit. Due to time and geographic constraints, these institutions were chosen based on their availability and level of cooperation</li> <li>A total of 778 respondents, 756 gave their consent for interviewing (97.17%). Entrepreneurs were selected randomly from each Strata.               <ul style="list-style-type: none"> <li>Treatment group: 389 (50.00%) and control group: 367 (47.17%)</li> <li>Detailed sample size selection described in Annex- B</li> </ul> </li> </ul> |
| Data collection                                                                     | <ul style="list-style-type: none"> <li>A structured questionnaire was designed in order to collect the information on economic activities, employment status, food consumption, and healthy behavior of the respondents.</li> <li>Aiming to enhance data accuracy and quality, data collection was done using tablets with Kobo Toolbox software.               <ul style="list-style-type: none"> <li>A pilot study was conducted for pre-testing the questionnaire.</li> <li>Extensive training was provided to the enumerators</li> </ul> </li> </ul>                                                                                                                                        |
| Qualitative Analysis                                                                |                                                                                                                                                                                                                                                                                                                                                                                                                                                                                                                                                                                                                                                                                                 |
| Method                                                                              | <ul style="list-style-type: none"> <li>Key-informant interviews of administrators directly responsible for the stimulus disbursal, intermediaries, experts, and academics in the field. (a total of 13 people)</li> </ul>                                                                                                                                                                                                                                                                                                                                                                                                                                                                       |
